# Supplementary material for: Dithizone nanofiber-coated membrane for filtration-enrichment and colorimetric detection of trace Hg(ii) ion
Source: Royal Society of Chemistry journal article supplement (doi:10.1039/b816461d), 2009-01-01
Supplement: b816461d.pdf [file b816461d.pdf]

## Supporting information

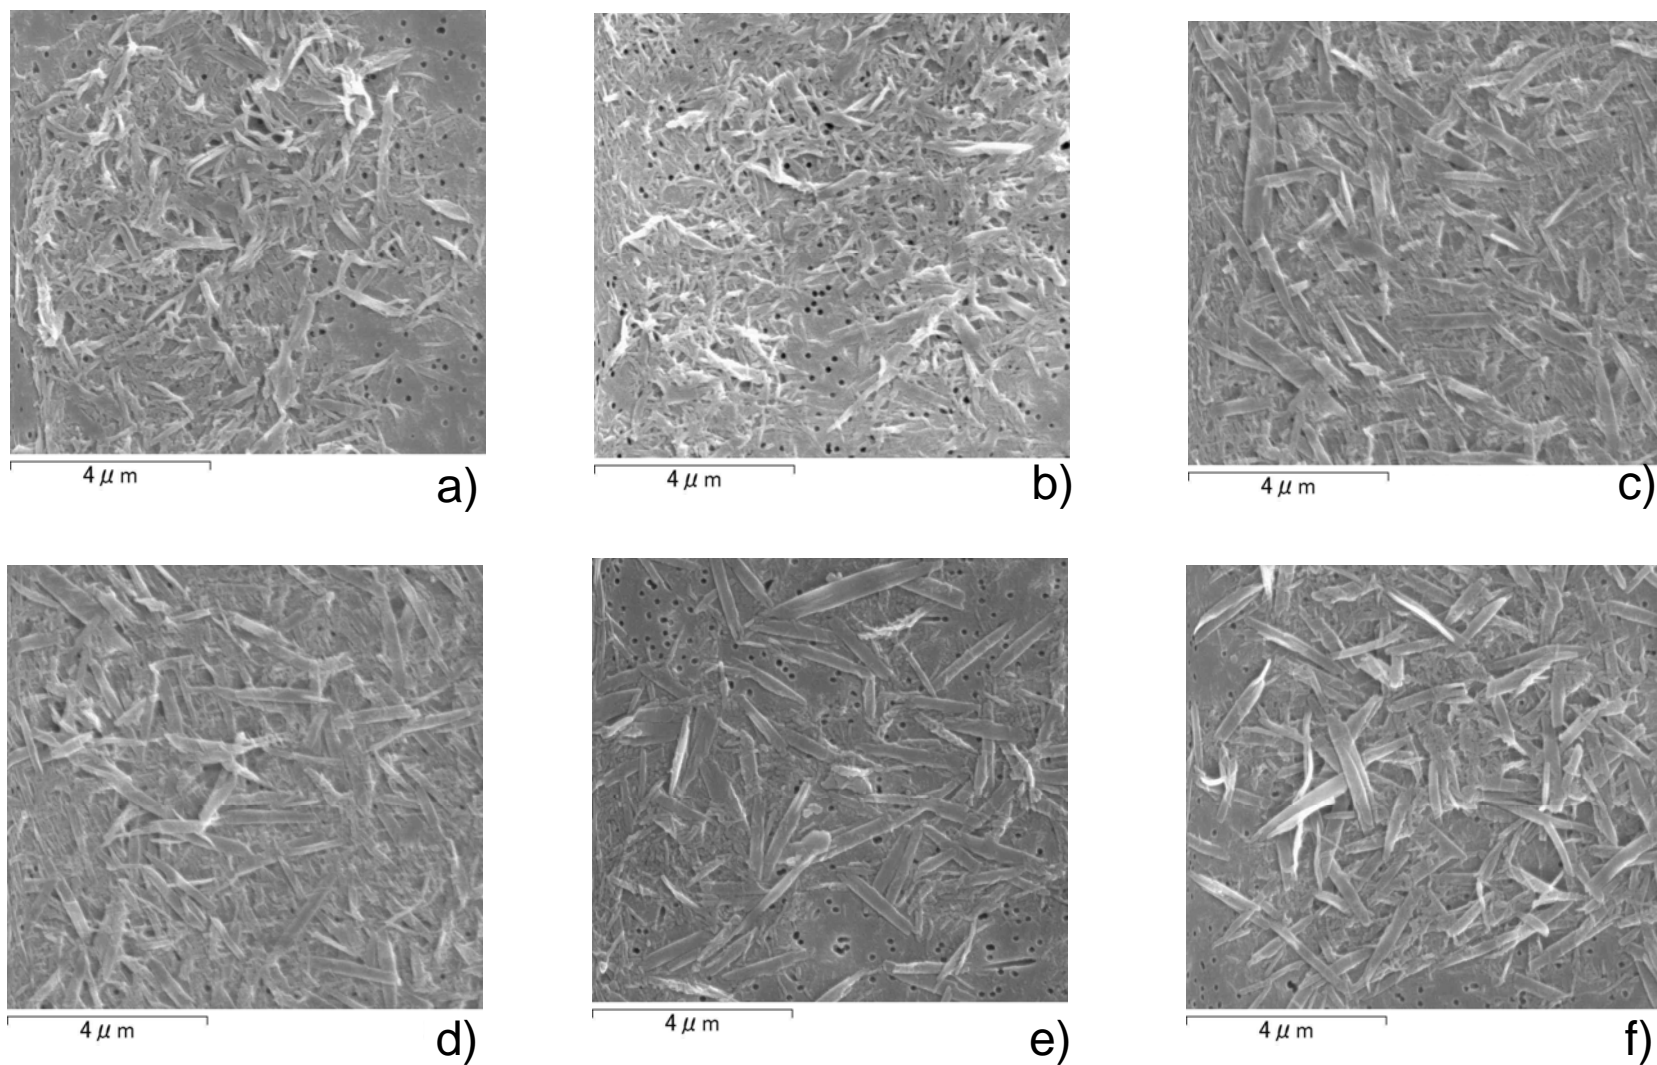

**Figure S1** SEM images of dithizone nanofibers on a polycarbonate membrane filter as a function of growth time. a) 0.5 min, b) 1.0 min, c) 1.5 min, d) 2.0 min, e) 2.5 min, and f) 3.0 min.

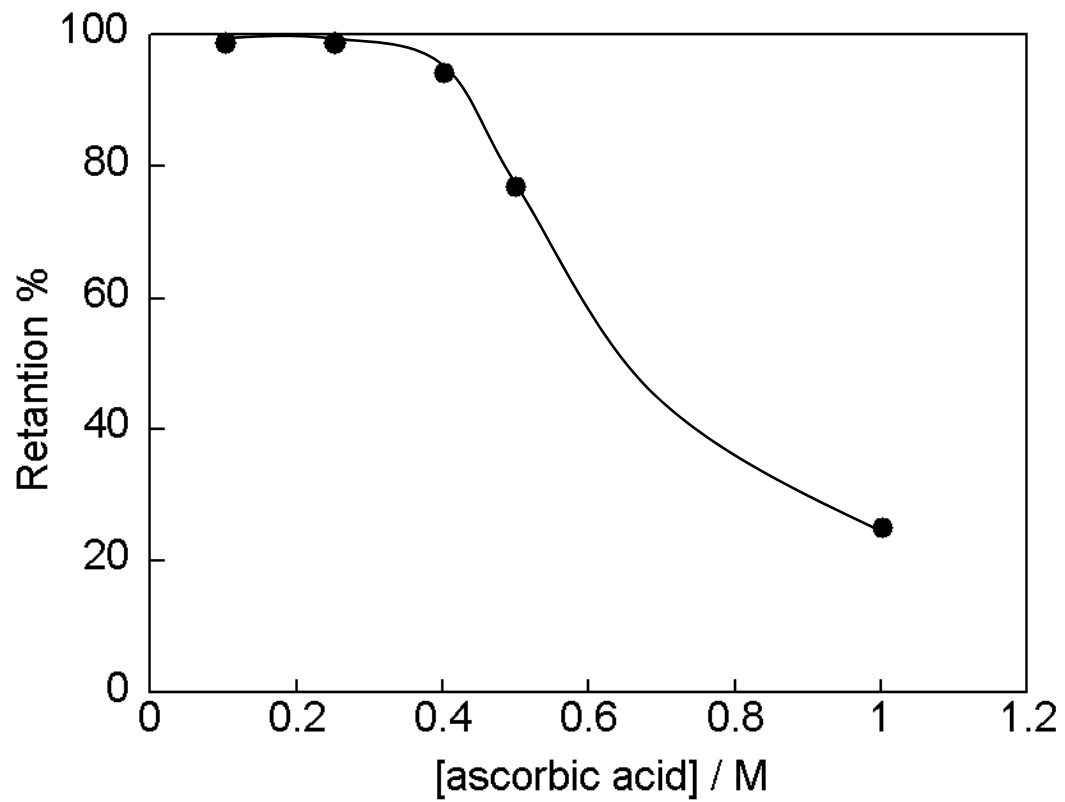

**Figure S2** Influence of the concentration of ascorbic acid on the recovery percentage of dithizone nanofiber on a mixed cellulose membrane filter.

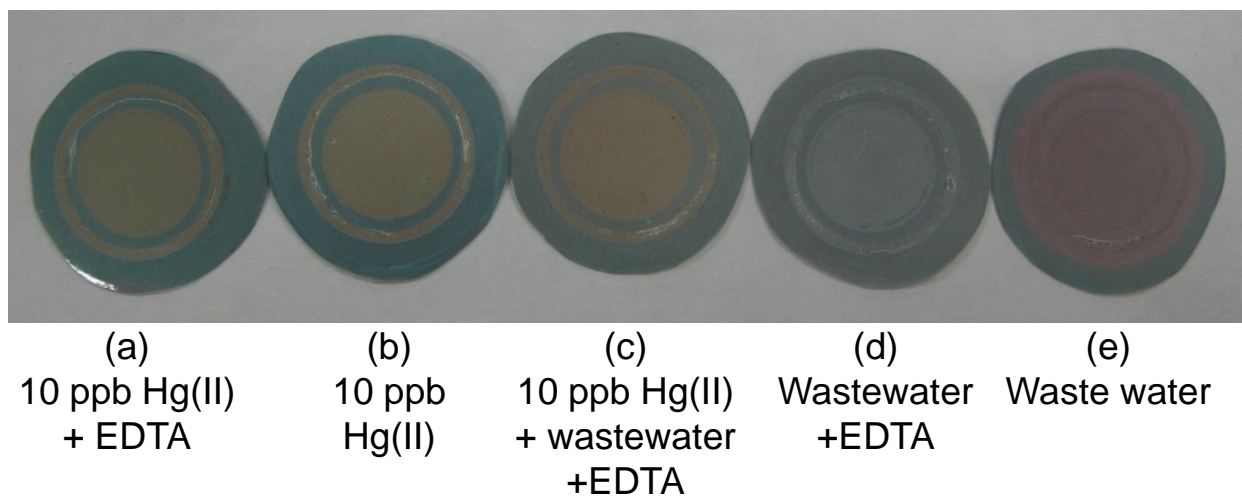

**Figure S3** A photograph of dithizone membranes after passing the solution containing 10 ppb of Hg(II) with/without artificial wastewater in the presence/absence of EDTA .  
Sample volume: 100 ml, flow rate: 5-6 ml min<sup>-1</sup>. Components of wastewater are listed in experimental section.

**Table S1** The tolerance limits of anions on the determination of Hg(II) at 10 ppb.<sup>a</sup>

| Anions                        | Concentration (M) | Concentration Ratio to Hg(II) ion (M/M) | Hg(II) found (ppb) | Recovery (%) |
|-------------------------------|-------------------|-----------------------------------------|--------------------|--------------|
| Cl <sup>-</sup>               | 0.6               | 12,120,000                              | 11.62              | 116          |
| Br <sup>-</sup>               | 10 <sup>-2</sup>  | 202,000                                 | 9.95               | 100          |
| SO <sub>4</sub> <sup>2-</sup> | 10 <sup>-1</sup>  | 2,020,000                               | 10.23              | 102          |
| PO <sub>4</sub> <sup>3-</sup> | 10 <sup>-2</sup>  | 202,000                                 | 10.16              | 102          |
| CO <sub>3</sub> <sup>2-</sup> | 10 <sup>-3</sup>  | 20,200                                  | 10.35              | 104          |
| NO <sub>3</sub> <sup>-</sup>  | 10 <sup>-2</sup>  | 202,000                                 | 10.00              | 100          |

a)  $2 \times 10^{-4}$  M EDTA and 0.01 M glycine buffer (pH 2.95) were added. The filtration rate was kept at 5-6 ml min<sup>-1</sup>.
